# Supplementary material
Source: ML conference proceedings conference paper supplement (https://openaccess.thecvf.com/content/WACV2024/html/Prashanth_Towards_Accurate_Disease_WACV_2024_paper.html)
Supplement: Supplementary file 1 [file Prashanth_Towards_Accurate_Disease_WACV_2024_supplemental.pdf]

All Images:

[https://drive.google.com/drive/folders/1IBSUKo6-L05Qlt88C1KVtKOsuNgvNr7z?usp=drive\\_link](https://drive.google.com/drive/folders/1IBSUKo6-L05Qlt88C1KVtKOsuNgvNr7z?usp=drive_link)

All disease masks:

[https://drive.google.com/drive/folders/1hyeqJ2oi6GJSN36N8lZ4xlZ5BUl4ckh6?usp=drive\\_link](https://drive.google.com/drive/folders/1hyeqJ2oi6GJSN36N8lZ4xlZ5BUl4ckh6?usp=drive_link)
